# Supplementary material
Source: PubMed Central journal article supplement (PMC6099872)
Supplement: pnas.1807881115.sapp.pdf [file pnas.1807881115.sapp.pdf]

Supplementary Information for

**Identification of a biologically active fragment of ALK and LTK-Ligand 2 (Augmentor- $\alpha$ )**

Andrey V. Reshetnyak<sup>1\*</sup>, Jyotidarsini Mohanty<sup>1</sup>, Francisco Tomé<sup>1</sup>, David E. Puleo<sup>1</sup>, Alexander Plotnikov<sup>1</sup>, Mansoor Ahmed<sup>1</sup>, Navjot Kaur<sup>2</sup>, Anton Poliakov<sup>3</sup>, Arul M. Cinnaiyan<sup>3</sup>, Irit Lax<sup>1</sup>, and Joseph Schlessinger<sup>1</sup>

Corresponding authors Joseph Schlessinger and Andrey Reshetnyak  
Email: [joseph.schlessinger@yale.edu](mailto:joseph.schlessinger@yale.edu) and [andrey.reshetnyak@stjude.org](mailto:andrey.reshetnyak@stjude.org)

**This PDF file includes:**

Supplementary text  
Figs. S1 to S3

## Supplementary Information Text

### Protein sequences of Fc-AUG- $\alpha$ (mammalian expression construct cloned in pCEP4 vector):

*METDTLLLWVLLLWVPGSTGAGSTHTCPPCPAPELLGGPSVFLFPPKPKDTLMI*  
SRTPEVTCVVVDVSHEDPEVKFNWYVDGVEVHNAKTKPREEQYNSTYRVVSV  
LTVLHQDWLNGKEYKCKVSNKALPAPIEKTISKAKGQPREPQVYTLPPSRDEL  
KNQVSLTCLVKGFYPSDIAVEWESNGQPENNYKTTTPVLDSDGSFFLYSKLTV  
DKSRWQQGNVFCFSVMHEALHNHYTQKSLSLSPGKASGAGSTTGGGGGGGG  
GSGGGGS**LEVLFQ/G**PGAEPREPADGQALLRLVVELVQELRKHHSAEHKGLQL  
LGRDCALGRAEAAGLGPSPEQRVEIVPRDLRMKDKFLKHLTGPLYFSPKCSKH  
FHRLYHNTRDCTIPAYYKRCARLLTRLAVSPVCMEDKQ

Signal peptide is in the italic; 3C protease cleavage site is in bold (/ is the actual cleavage site)

### Protein sequences of Fc-ALK (mammalian expression construct cloned in pCEP4 vector):

*METDTLLLWVLLLWVPGSTGAGSTHTCPPCPAPELLGGPSVFLFPPKPKDTLMI*  
SRTPEVTCVVVDVSHEDPEVKFNWYVDGVEVHNAKTKPREEQYNSTYRVVSV  
LTVLHQDWLNGKEYKCKVSNKALPAPIEKTISKAKGQPREPQVYTLPPSRDEL  
KNQVSLTCLVKGFYPSDIAVEWESNGQPENNYKTTTPVLDSDGSFFLYSKLTV  
DKSRWQQGNVFCFSVMHEALHNHYTQKSLSLSPGKTSLYKKAG**FENLYFQ/GL**  
NDIFEAQKIEWHETAPKSRNLFERNPNKELKPGENSPRQTPIFDPTVHWLFTTC  
GASGPHGPTQAQCNNAYQNSNLSVEVGSEGPLKGIQIWKVPATDTYSISGYGA  
AGGKGGKNTMMRSHGVSVLGIFNLEKDDMLYILVGQQGEDACPSTNQLIQKVC  
IGENNVIEEIRVNRVHEWAGGGGGGGGATYVFKMKDGVPLIIAAGGGGR  
AYGAKTDTFHPERLENNSSVLGLNGNSGAAGGGGGWINDNTSLLWAGKSLQE  
GATGGHSCPQAMKKWGWETRGGFGGGGGGCGSSGGGGGGYIGGNAASNND  
PEMDGEDGVSFISPLGILYTPALKVMEGHGEVNIKHLYLNCSEVDECHMDPE  
SHKVICFCDHGTVLAEDGVSCIVSPTPEPHGLNDIFEAQKIEWHE

Signal peptide is italic; TEV protease cleavage site is in bold; Biotin Acceptor Peptide is underlined.

### Protein sequences of Trx-AUG- $\alpha$ AD *E. coli* expression construct cloned in pET42 vector):

MHHHHHH**FENLYFQ/G**SDKIIHLTDDSFDTDVLKADGAILVDFWAEWCGPCKMIA  
PILDEIADEYQGKLTVAKLNIDQNPGTAPKYGIRGIPTLLLKNGEVAATKVGALS  
KGQLKEFLDANLAGGGGS**LEVLFQ/G**PSPEQRVEIVPRDLRMKDKFLKHLTGPL  
YFSPKCSKHFHRLYHNTRDCTIPAYYKRCARLLTRLAVSPVCMEDKQ

TEV protease and 3C protease cleavage sites are in bold (/ is the actual cleavage site);



**Fig. S2 Mass Spectrometric Analysis of Dimeric AUG- $\alpha$ .**

**A**

GPGAEPREPADGQALLRLVVELVQELRKHSAEHKGLQLLGRD**C**ALGRAEAAGLGPSPEQRVEIVP  
 RDLRMKDKFLKHLTGPLYFSPK**C**SKHFHRLYHNTRD**C**TIPAYYKR**C**ARLLTRLAVSPV**C**MEDKQ

GPGAEPREPADGQALLRLVVELVQELRKHSAEHKGLQLLGRD**C**ALGRAEAAGLGPSPEQRVEIVP  
 RDLRMKDKFLKHLTGPLYFSPK**C**SKHFHRLYHNTRD**C**TIPAYYKR**C**ARLLTRLAVSPV**C**MEDKQ

**B**

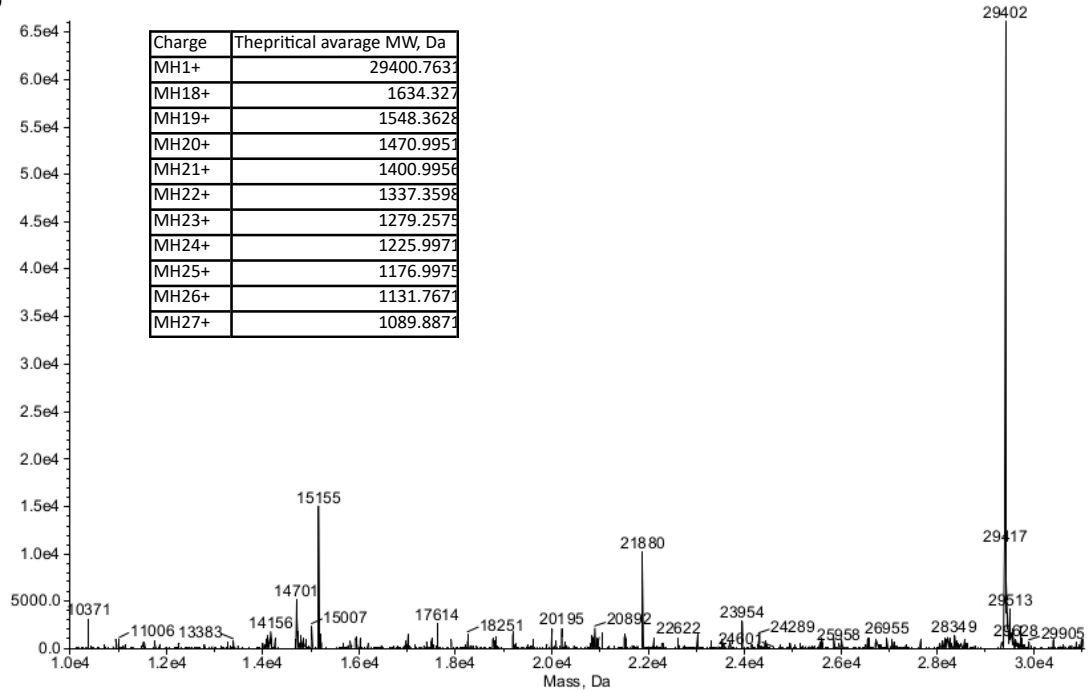

**C**

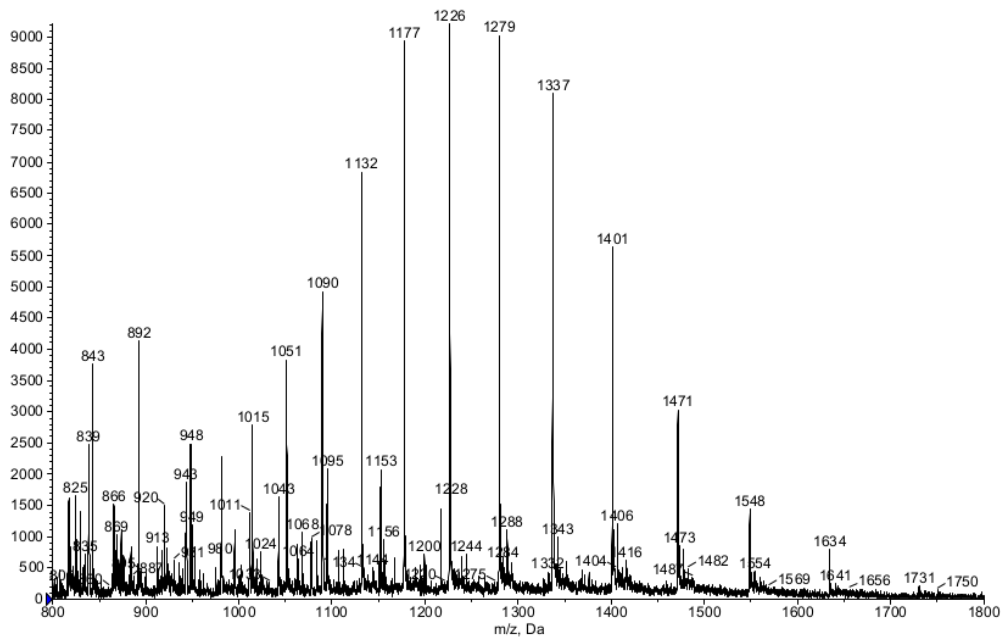

(A) Primary structure of dimeric AUG- $\alpha$ . First two residues highlighted in bold are artificial residues from 3C protease cleavage site. All cysteines are highlighted in red and bold. Intramolecular disulfide bridges are shown with solid red lines; intermolecular disulfide bridge is shown with dash red line.

(B and C) ESI-TOF high accuracy mass spectrometric analysis of dimeric AUG- $\alpha$ . Theoretically predicted average molecular mass is represented in the insert of (B).

**Fig. S3 Limited Proteolysis of ALK Ligand Binding Region.**

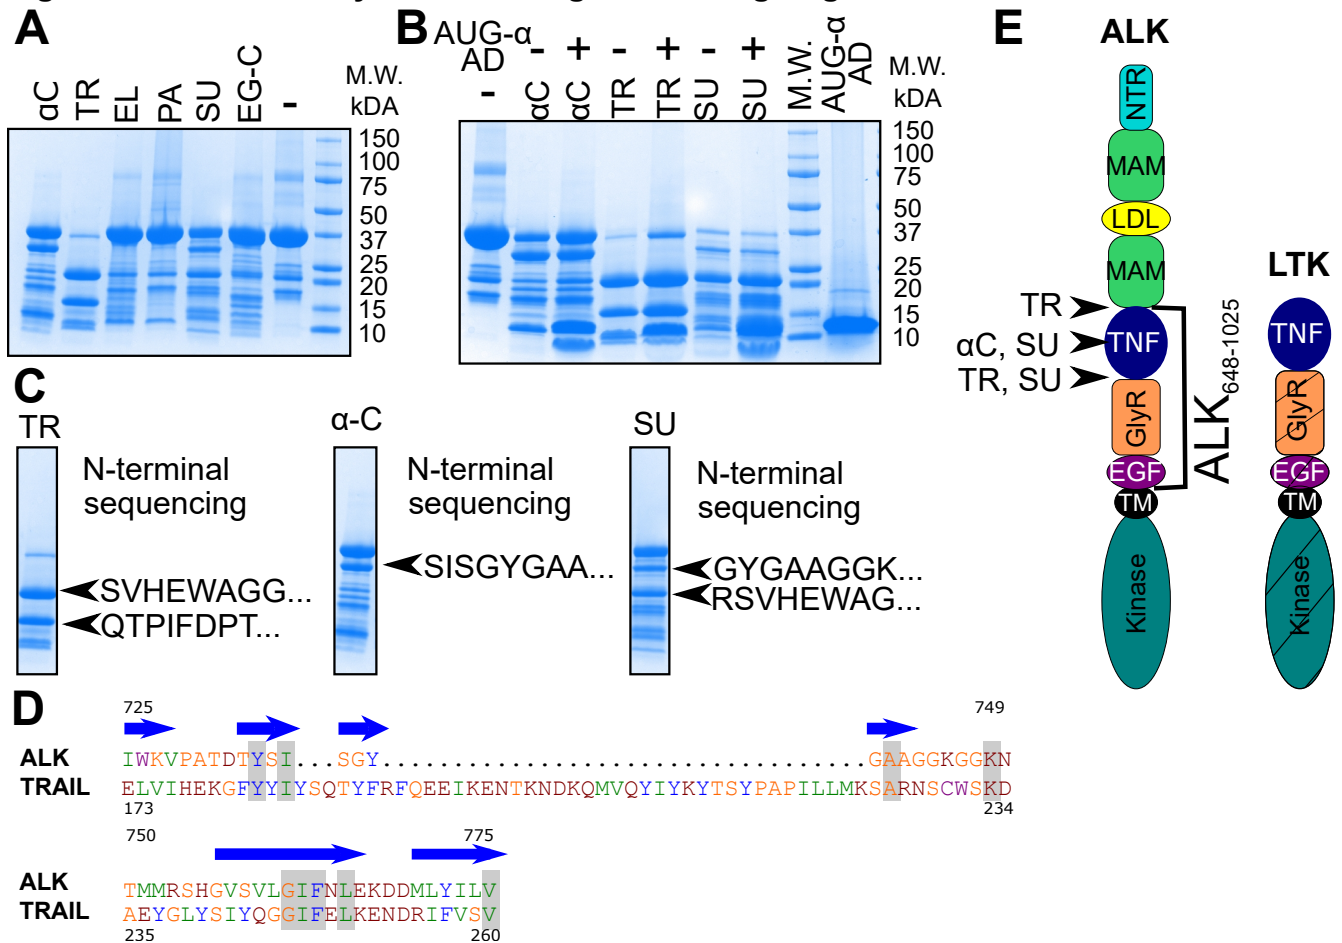

(A and B) SDS-PAGE analysis of ALK fragment (residues 648-1025) after limited proteolysis with a set of proteolytic enzymes. ALK fragment was incubated with different proteolytic enzymes at a ratio 1:100 protease:ALK at room temperature for 1 hour, and cleavage reaction was monitored by SDS-PAGE. Abbreviations are as follows: αC – α-Chymotrypsin, TR – trypsin, EL – elastase, PA – papain, SU – subtilisin and endoproteinase Glu-C. - is a negative control ALK fragment which was not incubated with any proteolytic enzymes. (B) Aug-α AD was added into limited proteolysis reaction where indicated (+). The ratio of protease:ALK was increased to 1:30, and ALK:Aug-α AD ratio was 1:5.

(C) Bands which were used for N-terminal sequencing are marked by arrows and corresponding sequences are shown for each band.

(D) Sequence alignment of putative ALK TNF-like motif with TRAIL motif. Alignment was performed using the Phyre2 server [1].

(E) Schematic representation of ALK and LTK domain organization. N-terminal domain (NTR) colored in cyan, MAM in green, LDL in yellow, TNF-like motif in dark blue, glycine-rich (Gly-Rich) in orange, EGF-like motif in purple, transmembrane (TM) in black, and kinase domain in blue. LTK domains are shown with striations.

## References

1. Kelley LA et al. (2015) The Phyre2 web portal for protein modeling, prediction and analysis *Nature Protocols* 10: 845-858.
